# Supplementary material for: Vibrational Analysis and Concentration Dependent SERS Study of Cefoperazone
Source: MDPI journal article supplement (doi:10.3390/chemosensors12030048), 2024-03-19
Supplement: s1 [file s1]

# Vibrational Analysis and Concentration Dependent SERS Study of Cefoperazone

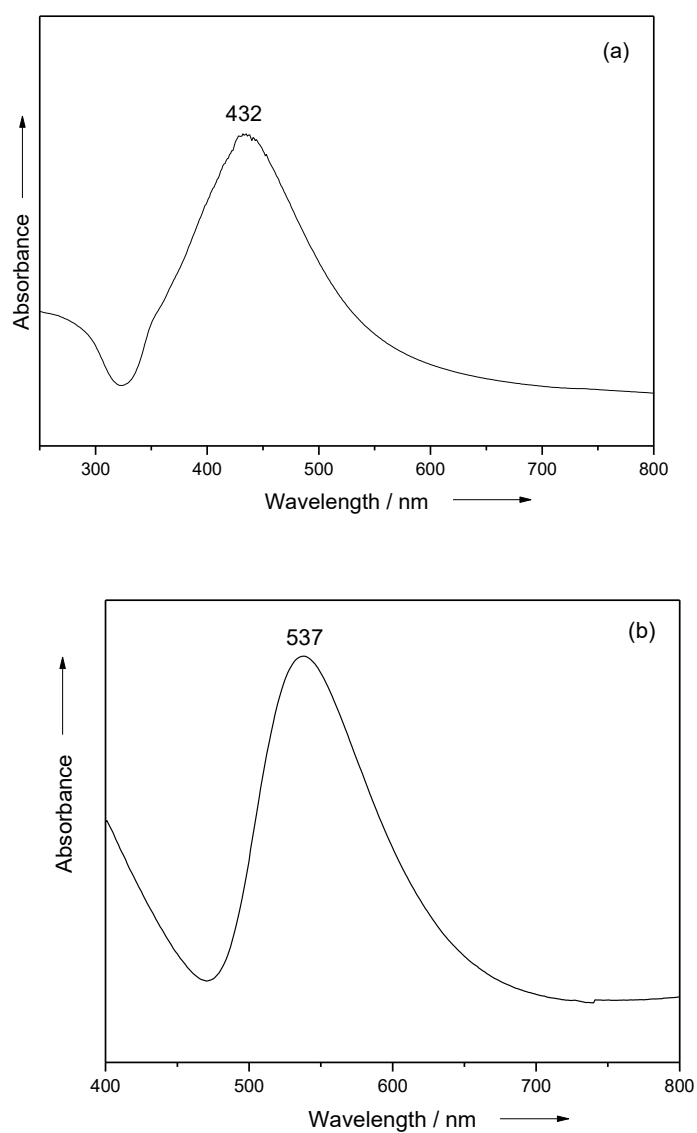

Figure S1. The UV-VIS absorption spectrum of silver (a) and gold (b) colloid.

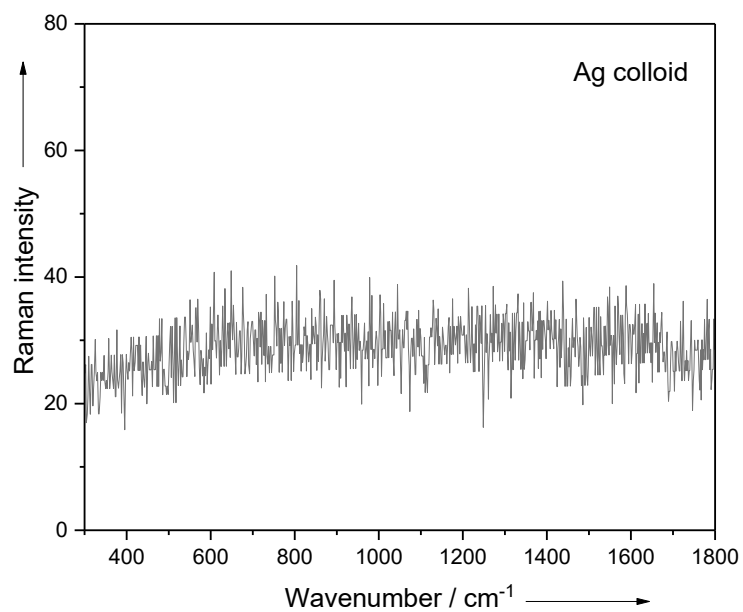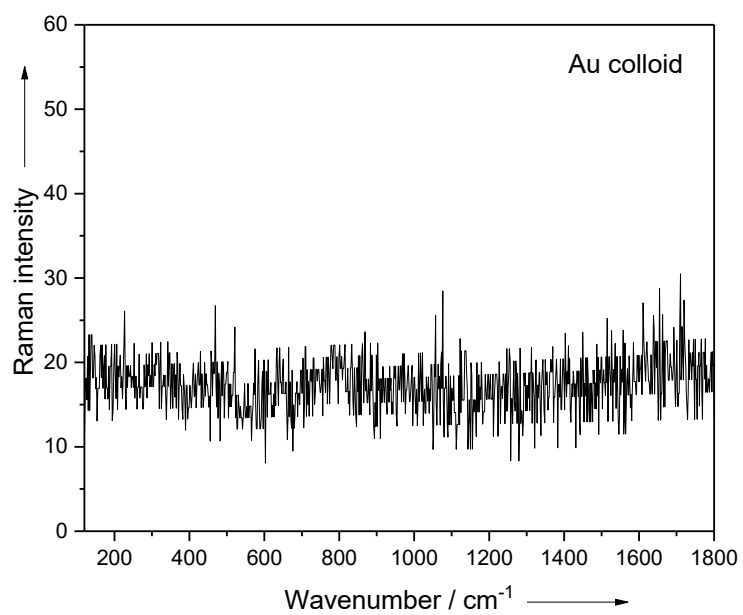

Figure S2. The Raman spectrum of silver and gold colloids.

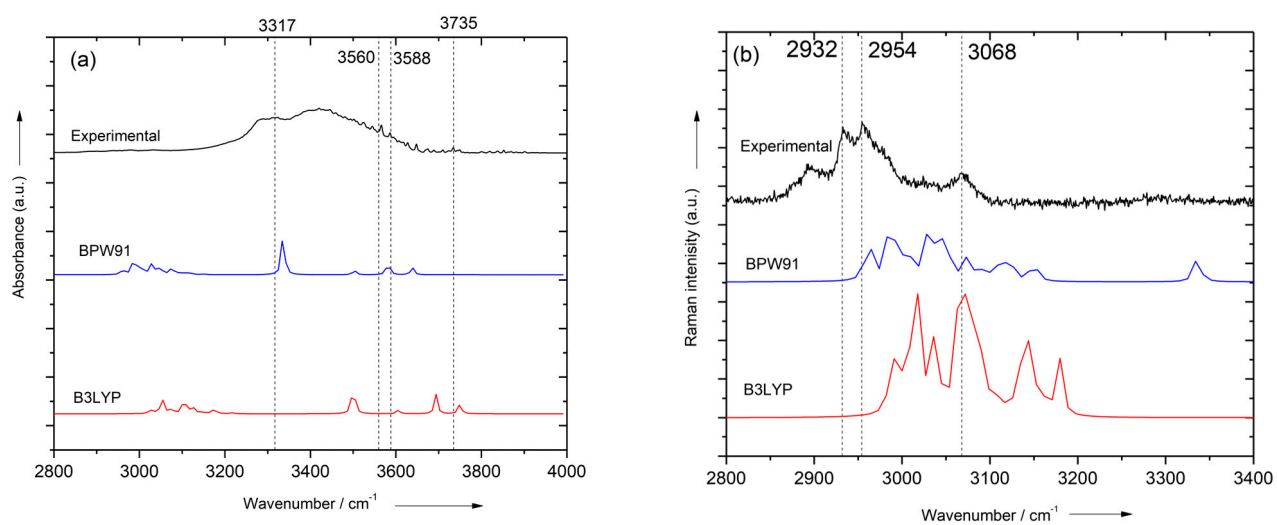

Figure S3. Experimental and theoretical (BPW91 and B3LYP) FT-IR **(a)** and Raman **(b)** spectra of cefoperazone in the high wavenumber region.
